# Supplementary material
Source: PubMed Central journal article supplement (PMC5677539)
Supplement: NIHMS913036-supplement.pdf [file NIHMS913036-supplement.pdf]

**Table S1 related to Figure 2. Details of the N12-i3 and N5-i5 interfaces based on the N12-i3/N5-i5 Fab-gp120<sub>93TH057</sub>core<sub>e</sub>+N/C-M48U1 and N5-i5-gp120<sub>93TH057</sub>core<sub>e</sub>-CD4 structures as calculated by the EBI PISA server ([http://www.ebi.ac.uk/msd-srv/prot\\_int/cgi-bin/piserver](http://www.ebi.ac.uk/msd-srv/prot_int/cgi-bin/piserver)).**

|                                           |                                    | N12-i3 Fab (1)-<br>gp120 <sub>93TH057</sub><br>core <sub>e</sub> +N/C-<br>M48U1 | N12-i3 Fab (2)-<br>gp120 <sub>93TH057</sub><br>core <sub>e</sub> +N/C-<br>M48U1 | N5-i5 Fab (1)-<br>gp120 <sub>93TH057</sub><br>core <sub>e</sub> +N/C-<br>M48U1 | N5-i5 Fab (2)-<br>gp120 <sub>93TH057</sub><br>core <sub>e</sub> +N/C-<br>M48U1 | N5-i5 Fab-<br>gp120 <sub>93TH057</sub><br>core <sub>e</sub> -CD4<br>(4H8W) |
|-------------------------------------------|------------------------------------|---------------------------------------------------------------------------------|---------------------------------------------------------------------------------|--------------------------------------------------------------------------------|--------------------------------------------------------------------------------|----------------------------------------------------------------------------|
| <b>Buried Surface Area, Å<sup>2</sup></b> | <b>gp120 total</b>                 | <b>831</b>                                                                      | <b>780</b>                                                                      | <b>924</b>                                                                     | <b>920</b>                                                                     | <b>918</b>                                                                 |
|                                           | 8-stranded β-sheet                 | 781                                                                             | 731                                                                             | 0                                                                              | 0                                                                              | 0                                                                          |
|                                           | Layer 1                            | 50                                                                              | 49                                                                              | 746                                                                            | 753                                                                            | 756                                                                        |
|                                           | Layer 2                            | 0                                                                               | 0                                                                               | 178                                                                            | 167                                                                            | 162                                                                        |
|                                           | Layer 3                            | 0                                                                               | 0                                                                               | 0                                                                              | 0                                                                              | 0                                                                          |
|                                           | <b>Heavy chain total</b>           | <b>764</b>                                                                      | <b>659</b>                                                                      | <b>686</b>                                                                     | <b>668</b>                                                                     | <b>679</b>                                                                 |
|                                           | FWR                                | 22                                                                              | 10                                                                              | 4                                                                              | 4                                                                              | 3                                                                          |
|                                           | CDR H1                             | 46                                                                              | 33                                                                              | 75                                                                             | 75                                                                             | 77                                                                         |
|                                           | CDR H2                             | 446                                                                             | 434                                                                             | 386                                                                            | 372                                                                            | 366                                                                        |
|                                           | CDR H3                             | 250                                                                             | 182                                                                             | 221                                                                            | 217                                                                            | 233                                                                        |
|                                           | <b>Light chain total</b>           | <b>141</b>                                                                      | <b>142</b>                                                                      | <b>326</b>                                                                     | <b>291</b>                                                                     | <b>278</b>                                                                 |
|                                           | FWR                                | 0                                                                               | 0                                                                               | 0                                                                              | 0                                                                              | 2                                                                          |
|                                           | CDR L1                             | 9                                                                               | 10                                                                              | 129                                                                            | 130                                                                            | 112                                                                        |
|                                           | CDR L2                             | 0                                                                               | 0                                                                               | 47                                                                             | 34                                                                             | 29                                                                         |
|                                           | CDR L3                             | 132                                                                             | 132                                                                             | 150                                                                            | 127                                                                            | 135                                                                        |
|                                           | <b>Heavy and light chain total</b> | <b>905</b>                                                                      | <b>801</b>                                                                      | <b>1012</b>                                                                    | <b>959</b>                                                                     | <b>957</b>                                                                 |

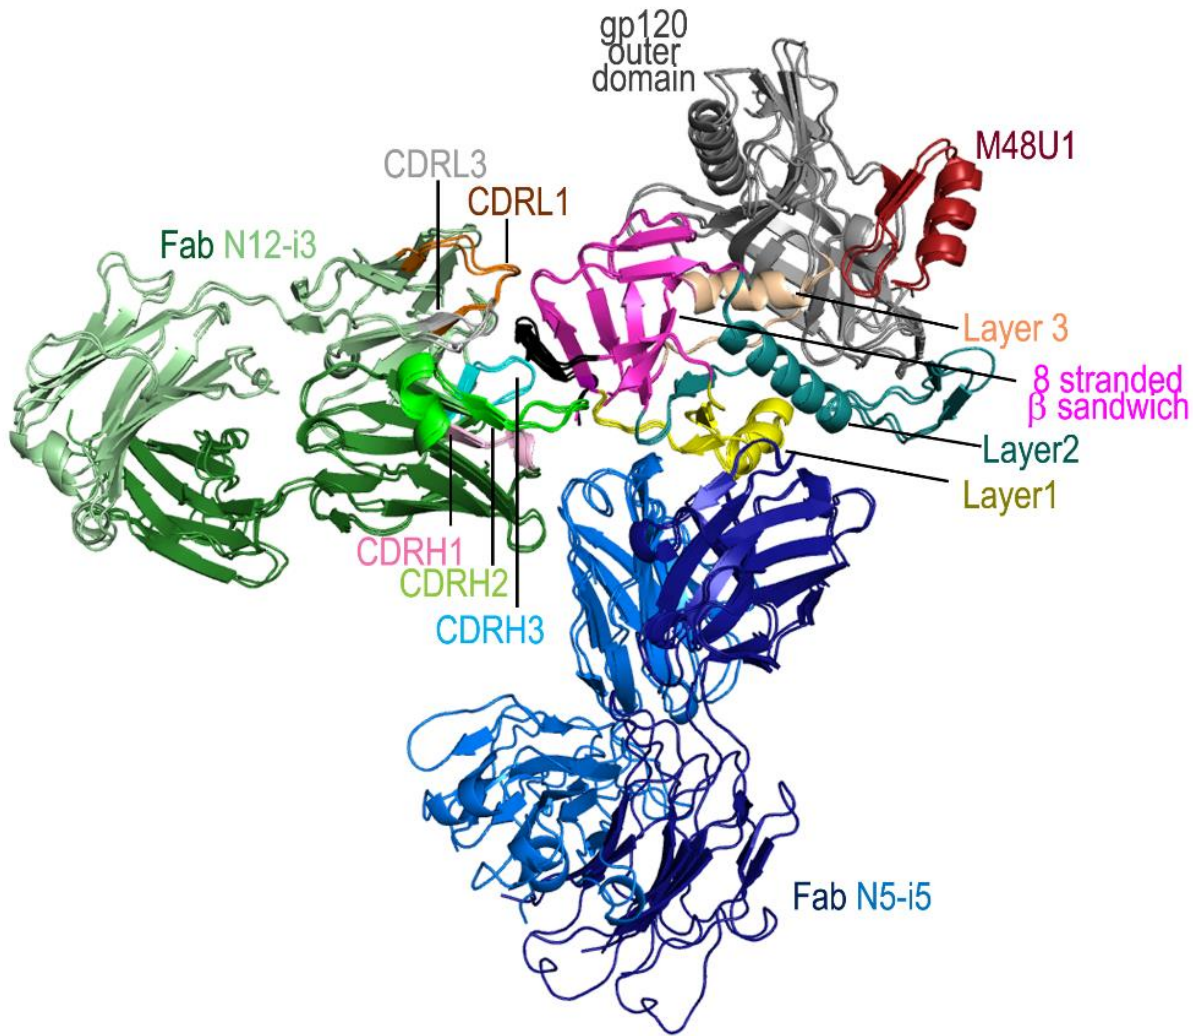

**Figure S1 related to Figure 1. Comparison of the two copies of the N12-i3 Fab/N5-i5 Fab- N/C-termini-gp120<sub>93TH057</sub>-core<sub>e</sub>-M48U1 complex from the asymmetric unit of crystal.** The root mean square deviation (RMSD) between copies is 3.1 Å for all residues and 1.13 Å for all residues except the N5-i5 Fab constant region reflecting the different relative position of this region between copies. The N5-i5 Fab constant region had few crystal contacts and high B-factors in contrast to the N5-i5 Fab variable region which was well defined in the electron density. gp120 mobile regions and N12-i3 Fab CDRs are colored as shown. By binding the edge of the  $\beta$ -sheet at the eighth strand, N12-i3 is able to grasp both sides burying 1753 Å<sup>2</sup> (copy 1) [or 1632 Å<sup>2</sup> (copy 2)] total surface area at the interface. N5-i5 binds layers 1 (yellow) and 2 (dark teal) of the inner domain almost identically to its structure in the absence of N12-i3 (PDB: 4H8W).

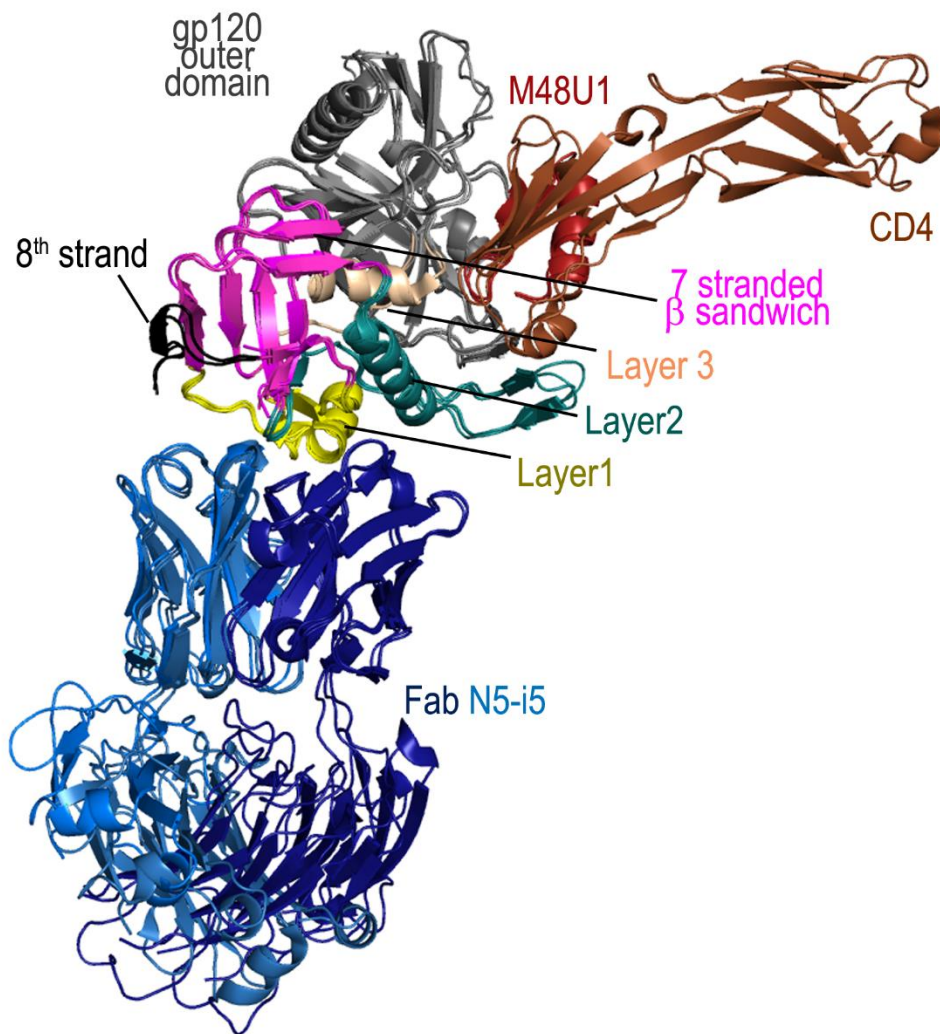

**Figure S2 related to Figure 2. Comparison of N5-i5 bound to Env antigen in N12-i3 Fab/N5-i5 Fab- N/C-termini-gp120<sub>93TH057</sub>-core<sub>e</sub>-M48U1 complex and N5-i5 Fab- gp120<sub>93TH057</sub>-core<sub>e</sub>-d1d2CD4 complex (PDB: 4H8W, (Acharya et al., 2014)). Structures were superimposed based on gp120 molecule. The RMSD between gp120 and the N5-i5 variable region to 4H8W is 0.758 Å (copy 1) and 0.760 Å (copy 2). The RMSD between gp120 and the full N5-i5 Fab to 4H8W is 5.71 Å (copy 1) and 7.66 Å (copy 2). The larger RMSD values for the full complex are largely due to the differing positions of the N5-i5 constant region between copies in the crystal and between crystals and not structural changes within the Fab constant region.**

|        |                                 |                 |                |                     |                                  |                 |                |         |       |       |     |
|--------|---------------------------------|-----------------|----------------|---------------------|----------------------------------|-----------------|----------------|---------|-------|-------|-----|
|        | 10                              | 20              | 30             | 40                  | 5052a                            | 60              | 70             | 8082abc | 90    | 100ab | 110 |
| N12-i3 | QVQLVQSGAEVKKPKGSSVRVSCKASGGSFS | RYLTVN          | WVRQAPGQGLEWMA | RFIPIFNPMDYAPKFG    | RITITADESTSTAYLELSSLTSDDTAVYYCAS | RQHHEYF-QE      | WGQGLVTVSS     |         |       |       |     |
|        |                                 | +               | ++             |                     | + +++++ + +                      |                 |                |         | + +++ |       |     |
| N5-i5  | EVQLVESGGGLVQPGGSLRLSCAASGFTFS  | IVYAMS          | WVRQAPGKLEWVS  | SINNSGRNIFESADSVKIG | RFTISRDNKNTLFLVMNSLRAEDTAVYYCAK  | DLRLGGGSDY      | WGQGLVTVSS     |         |       |       |     |
|        |                                 | +++             |                | +++ ++ +            |                                  |                 |                |         | ++    |       |     |
|        | -----FWR1-----                  | -----CDRH1----- | -----FWR2----- | -----CDRH2-----     | -----FWR3-----                   | -----CDRH3----- | -----FWR4----- |         |       |       |     |

  

|        |                          |                 |                 |                 |                                  |                 |                |    |    |        |      |     |     |
|--------|--------------------------|-----------------|-----------------|-----------------|----------------------------------|-----------------|----------------|----|----|--------|------|-----|-----|
|        | 10                       | 20              | 27abc           | 30              | 40                               | 50              | 60             | 70 | 80 | 90     | 95ab | 100 | 107 |
| N12-i3 | EIVLTQSPGTLSMSPGERATLSC  | RASRT--VSSSNLA  | WYQQKPGQAPRLLIY | DVSSRAT         | GIPDRFSGRGSQDFTLTISRLEPEDFAVYYC  | QQYGTSP--LT     | FGGGTKVEIK     |    |    |        |      |     |     |
|        |                          | +               | ++              |                 |                                  |                 |                |    |    | ++   + |      |     |     |
| N5-i5  | -QSALTQPASVSGSPGQSITISIC | TGTSSDVGSIYFVS  | WYQHHPGKAPKLMIV | EVSERPS         | GISNRFSGSKSGNTASLTISGLQAEDEADYYC | SSYAGSTTFRV     | FGGGTKLTVR     |    |    |        |      |     |     |
|        |                          | +++ +           |                 |                 |                                  |                 |                |    |    | + ++ + |      |     |     |
|        | -----FWR1-----           | -----CDRL1----- | -----FWR2-----  | -----CDRL2----- | -----FWR3-----                   | -----CDRL3----- | -----FWR4----- |    |    |        |      |     |     |

**Figure S3 related to Figure 3. Antibody contact residues.** mAb side chain (+) and main chain (-) contact residues colored green for hydrophobic, blue for hydrophilic and black for both as determined by a 5 Å cut off value over the corresponding sequence. CDRs are colored as in Figure 2 and 3 and buried surface residues as determined by PISA are shaded.

**B**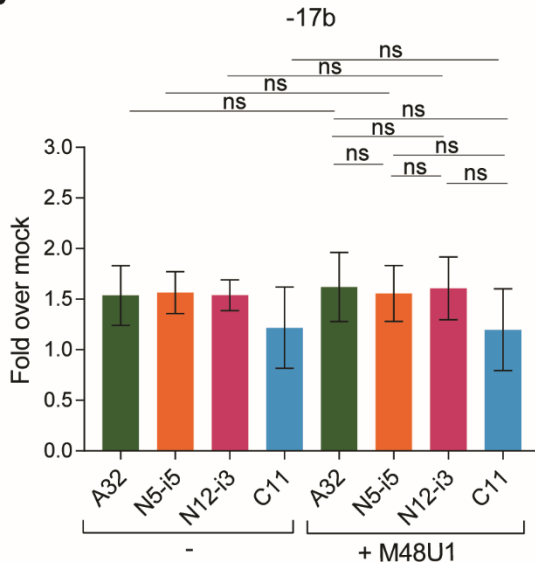**C**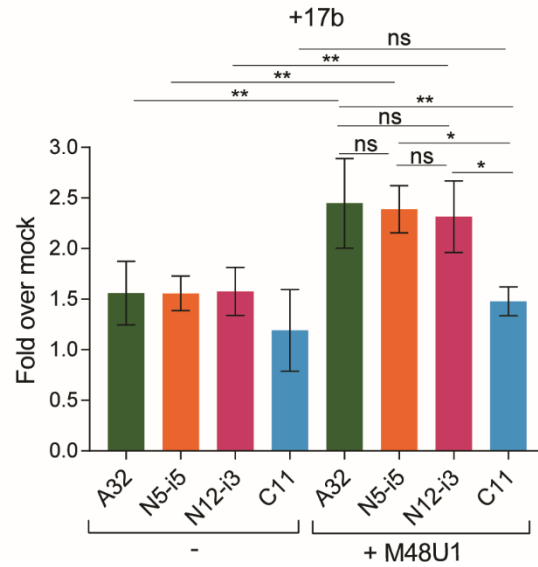

**Figure S4 related to Figure 5. Exposure of Cluster A epitopes within the CEM.NKr cells infected with HIV-1NL-4.3 ADA/GFP virus.** CEM.NKr cells were infected with HIV-1NL-4.3 ADA GFP virus, and 48h post-infection cells were stained with Alexa Fluor 647 labeled Cluster A mAbs in presence or absence of M48U1 (100nM) and/or mAb 17b (5µg/ml). The binding is shown as a mean and standard deviation of the mean fluorescence intensity over mock-infected cells. Data are the averages of four independent experiments. Statistical significant was evaluated using paired student t test, \* P <0.05, \*\* P <0.01; ns, not significant.

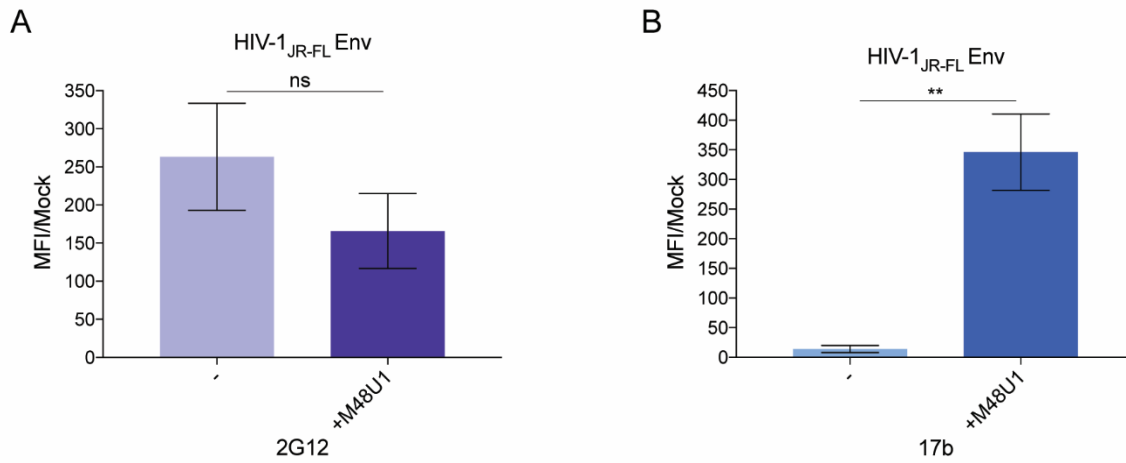

**Figure S5 related to Figure 5. M48U1 exposes the 17b epitope at the surface of Env<sub>JRFL</sub> expressing cells.** 293T cells were transfected with an empty vector pcDNA3.1 plasmid or a plasmid expressing the cytoplasmic-tail-deleted HIV-1 Env<sub>JRFL</sub>. Two days post-transfection Env expression was evaluated with the 2G12 antibody which recognizes the gp120 outer domain in the presence or absence of CD4 mimetic-M48U1 (100nM) by flow cytometry as described in Experimental Procedures.
